# Supplementary material for: Microcystin Content in Phytoplankton and in Small Fish from Eutrophic Nyanza Gulf, Lake Victoria, Kenya
Source: Toxins (Basel). 2018 Jul 3;10(7):275. doi: 10.3390/toxins10070275 (PMC6070987; doi:10.3390/toxins10070275)
Supplement: Supplementary file 1 [file toxins-10-00275-s001.pdf]

# Supplementary Materials: Microcystin Content in Phytoplankton and in Small Fish from Eutrophic Nyanza Gulf, Lake Victoria, Kenya

Benard Mucholwa Simiyu, Steve Omondi Oduor, Thomas Rohrlack, Lewis Sitoki and Rainer Kurmayer

**Table S1.** Phytoplankton taxa which were discriminated for biovolume estimation.

| Genus                     | Author (Genus)         | depth-integrated | surface | patch | shore | Rusinga channel |
|---------------------------|------------------------|------------------|---------|-------|-------|-----------------|
| Cyanobacteria             |                        |                  |         |       |       |                 |
| <i>Anabaena</i>           | Bory ex Bornet         |                  |         |       |       |                 |
| ( <i>Dolichospermum</i> ) | & Flahault             | x                | x       | x     | x     | x               |
| <i>Aphanocapsa</i>        | C.Nägeli               |                  |         |       |       | x               |
| <i>Chroococcus</i>        | Nägeli                 |                  |         |       |       | x               |
| <i>Cyanodictyon</i>       | A.Pascher              |                  |         |       |       | x               |
| <i>Planktolyngbya</i>     | Anagnostidis & Komárek | x                | x       | x     | x     | x               |
| <i>Microcystis</i>        | Lemmermann             | x                | x       | x     | x     | x               |
| <i>Romeria</i>            | M.Koczwara             |                  |         |       |       | x               |
| <i>Merismopedia</i>       | F.J.F.Meyen            |                  |         |       |       | x               |
| Chlorophyceae             |                        |                  |         |       |       |                 |
| <i>Chlamydomonas</i>      | Ehrenberg              | x                |         |       | x     | x               |
| <i>Coelastrum</i>         | Nägeli                 |                  |         |       |       | x               |
| <i>Pediastrum</i>         | Meyen                  |                  |         |       |       | x               |
| <i>Scenedesmus</i>        | Meyen                  |                  |         |       |       | x               |
| <i>Staurastrum</i>        | Chodat                 |                  |         |       |       | x               |
| Bacillariophyceae         |                        |                  |         |       |       |                 |
| <i>Aulacoseira</i>        | Thwaites               | x                |         |       |       |                 |
| <i>Nitzschia</i>          | Hassall                |                  |         |       |       | x               |
| Cryptophyceae             |                        |                  |         |       |       |                 |
| <i>Cryptomonas</i>        | Ehrenberg              | x                | x       | x     | x     | x               |

X, detected.

**Table S2.** Meteorological characteristics for dates of fish drying to study the stability of microcystin in fish samples (MET Department, Kisumu Airport).

| Date        | Air temperature (°C) | Irradiance ( $\mu\text{mol photons m}^{-2} \text{s}^{-1}$ ) | Evaporation (mm/day) | Wind speed (knots) (Cumulative: 11.00 am to 5.00 pm) | Relative Humidity (%) <sup>1</sup> |
|-------------|----------------------|-------------------------------------------------------------|----------------------|------------------------------------------------------|------------------------------------|
| 27 Oct 2011 | 22.7                 | 866                                                         | 4                    | 197,084                                              | 80                                 |
| 8 Nov 2011  | 24.95                | 1185                                                        | 6.5                  | 83,042                                               | 35                                 |
| 5 Dec 2011  | 23.75                | 1297                                                        | 3.5                  | 145,086                                              | 78                                 |
| 9 Jan 2012  | 23.65                | 1238                                                        | 6                    | 145,076                                              | 62                                 |
| 10 Jan 2012 | 23.6                 | 1387                                                        | 6                    | 162,056                                              | 66                                 |

<sup>1</sup> calculated from temperature, wind speed, and evaporation rate.

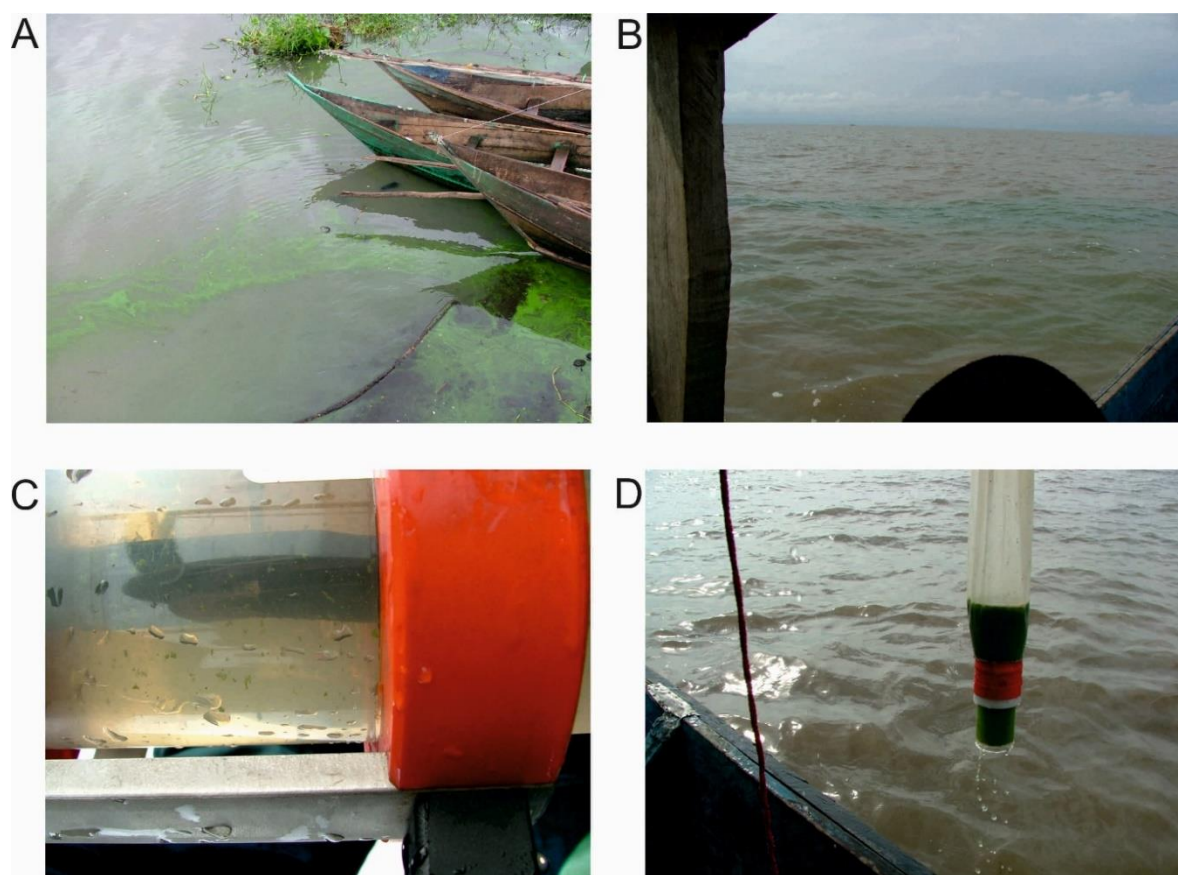

**Figure S1.** Sampling sites in Nyanza Gulf, L. Victoria showing cyanobacteria mass accumulation, (A) at the shore of the Dunga beach landing site near Kisumu, (B) patches formed by wind action in Kisumu Bay, (C) macroscopic colonies of *Microcystis* in the water sample at ST1, (D) phytoplankton net sample taken at ST1. The maximum MC concentrations were recorded from shore and patch samples (see Figure 2).

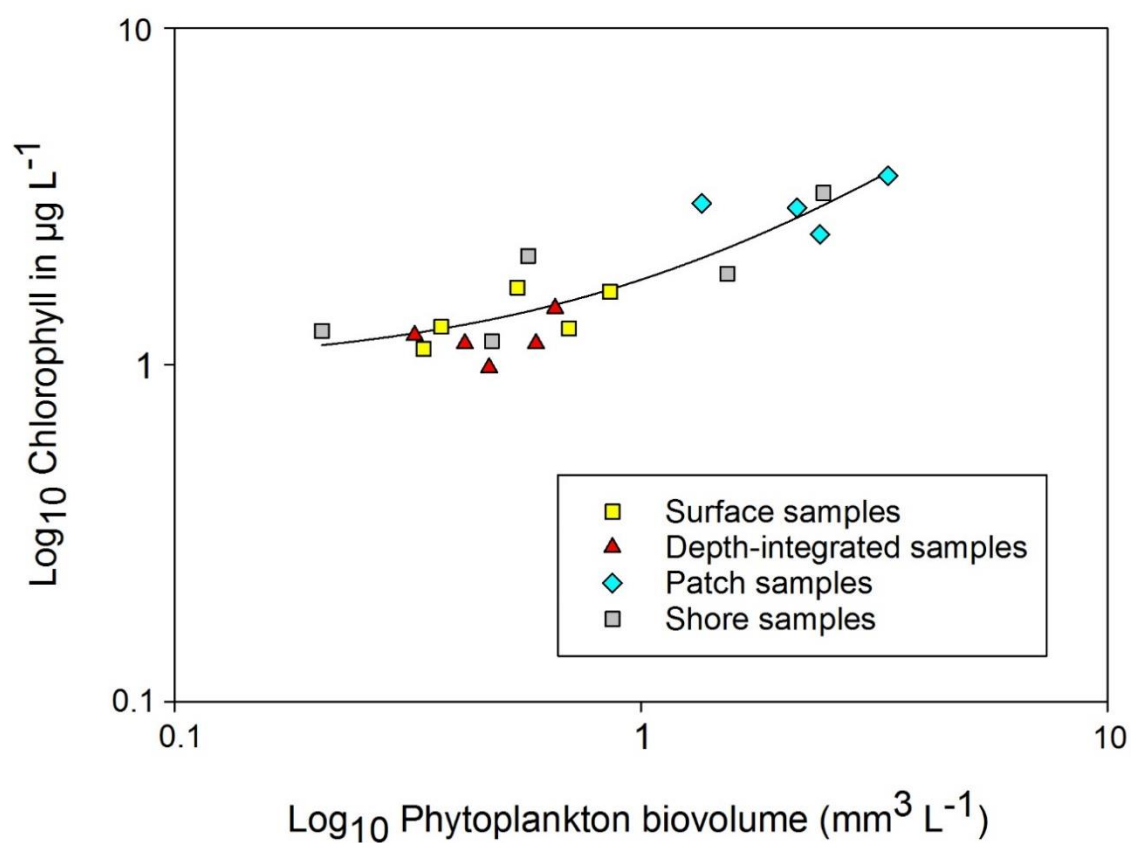

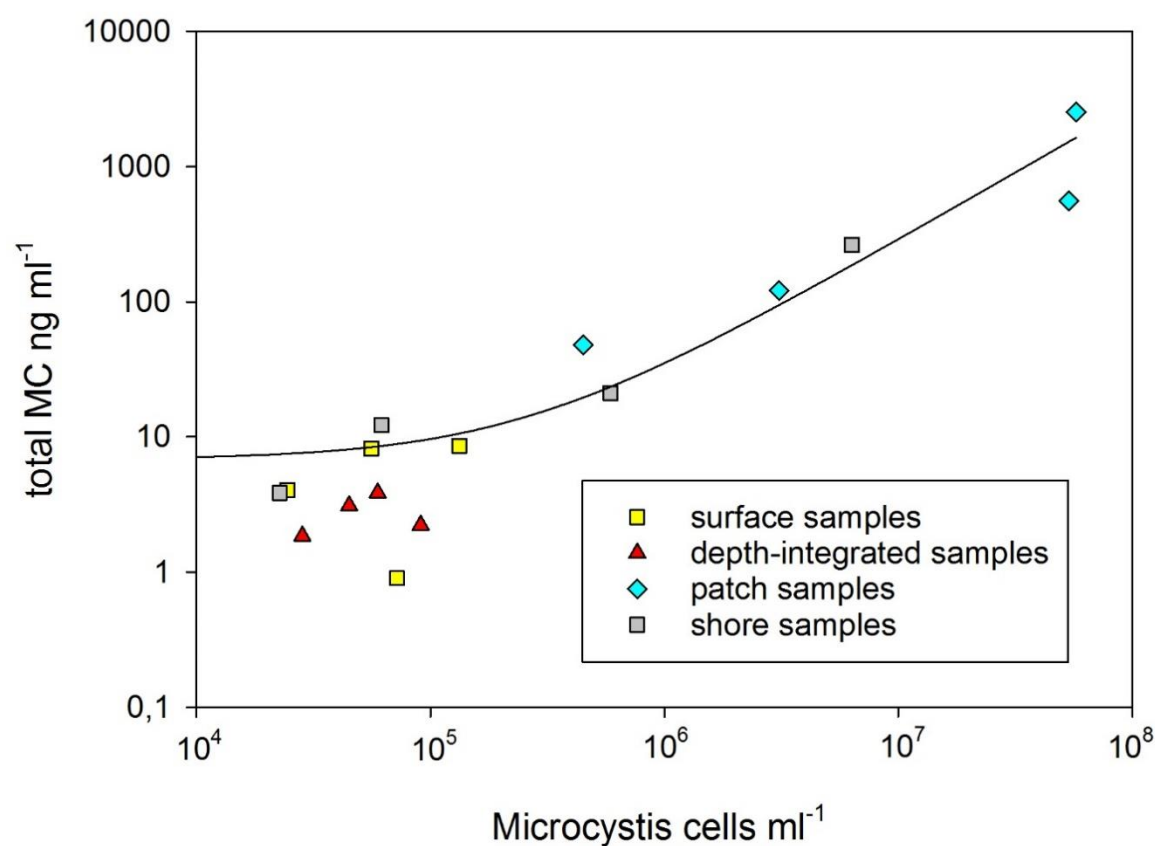

**Figure S3.** Relationship between *Microcystis* cell numbers and total (intracellular and dissolved) MC concentration for all water samples from different sample types in Kisumu Bay, Nyanza Gulf, and Rusinga channel, Lake Victoria:  $y = 2.84 \times 10^{-5}x + 6.8044$ , where  $y$  is MC in ng/ml and  $x$  is *Microcystis* cell number/ml ( $R^2 = 0.71$ ), ( $n = 19$ ). No MC was detected in samples from Rusinga channel.

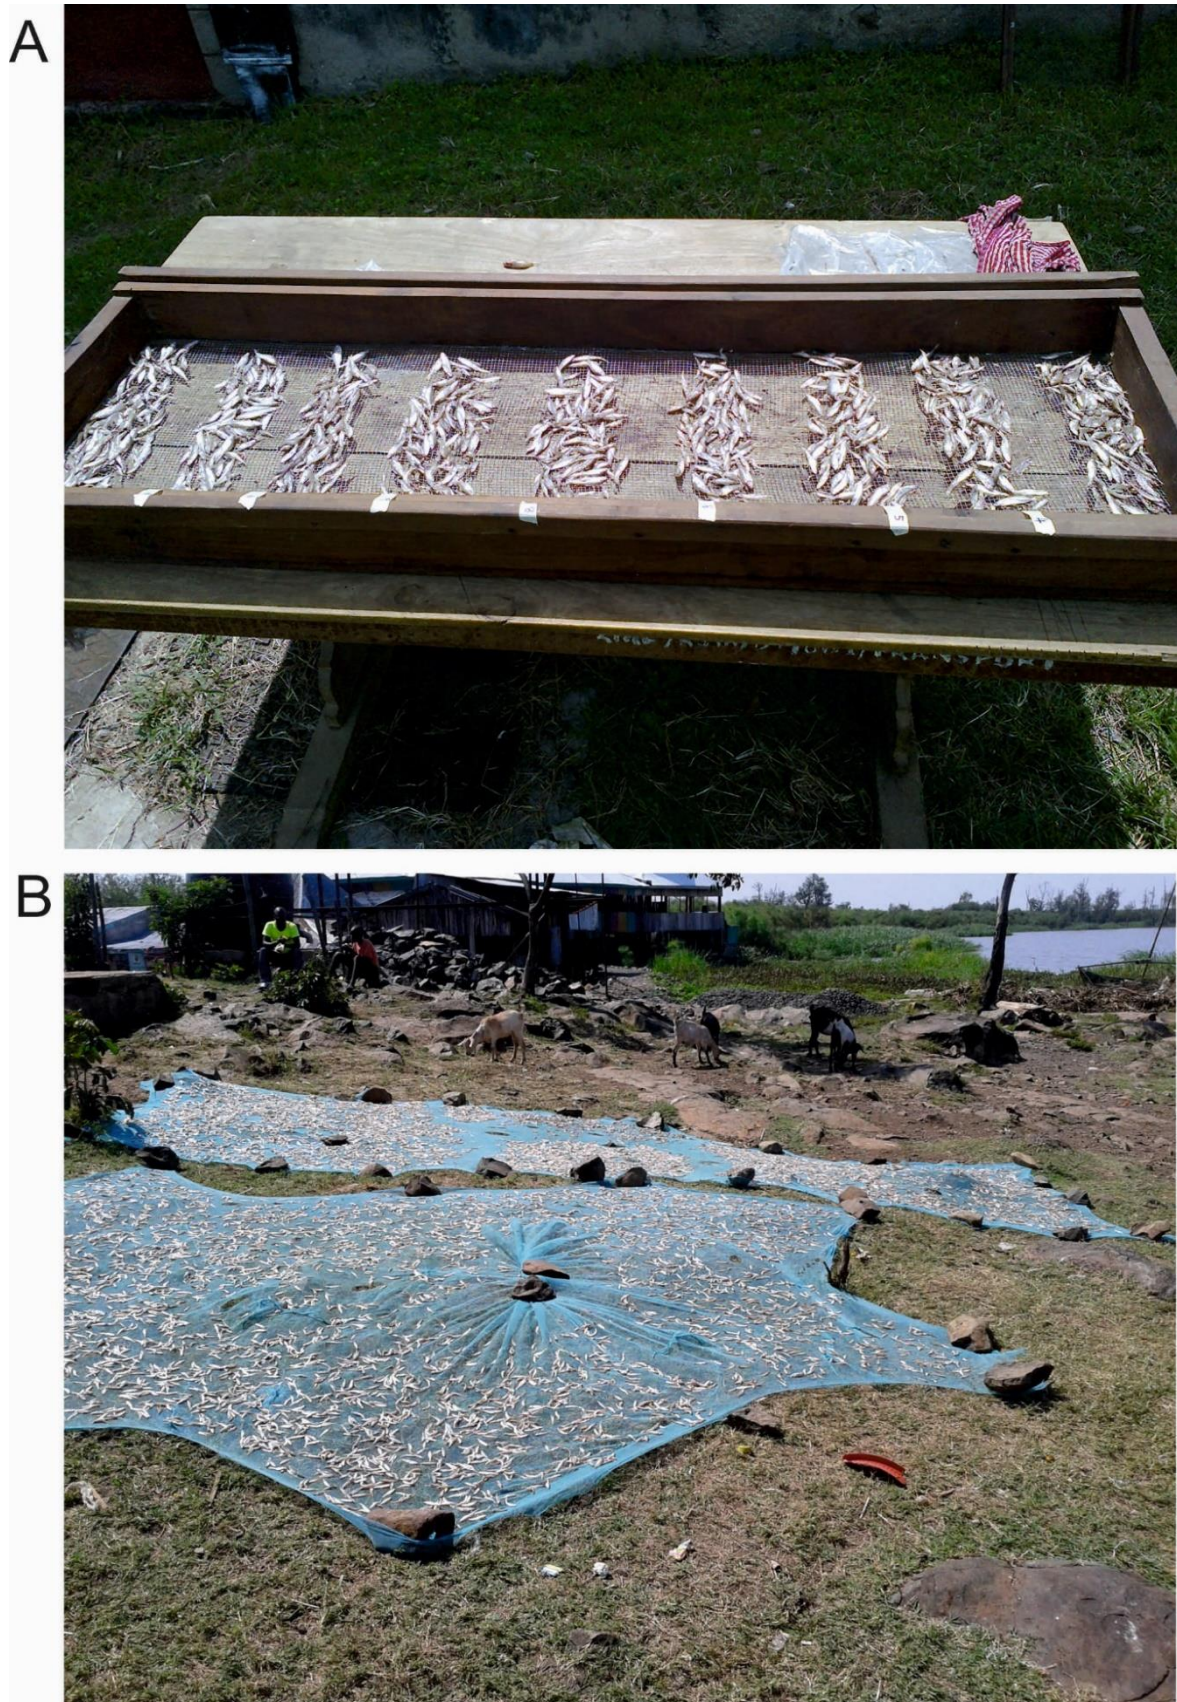

**Figure S4.** (A) Drying of fish samples for the experiment on microcystin stability (0-8 h), (B) Drying of fish for the market at the Dunga Beach landing site (Kisumu).
